# Supplementary material
Source: Springer Nature journal article supplement (https://www.springermedizin.de/resource/supplementary/12913_2008_708_MOESM3_ESM.pdf/9535364)

## Urban Areas More Than 1 Hour from Specialized Palliative Services

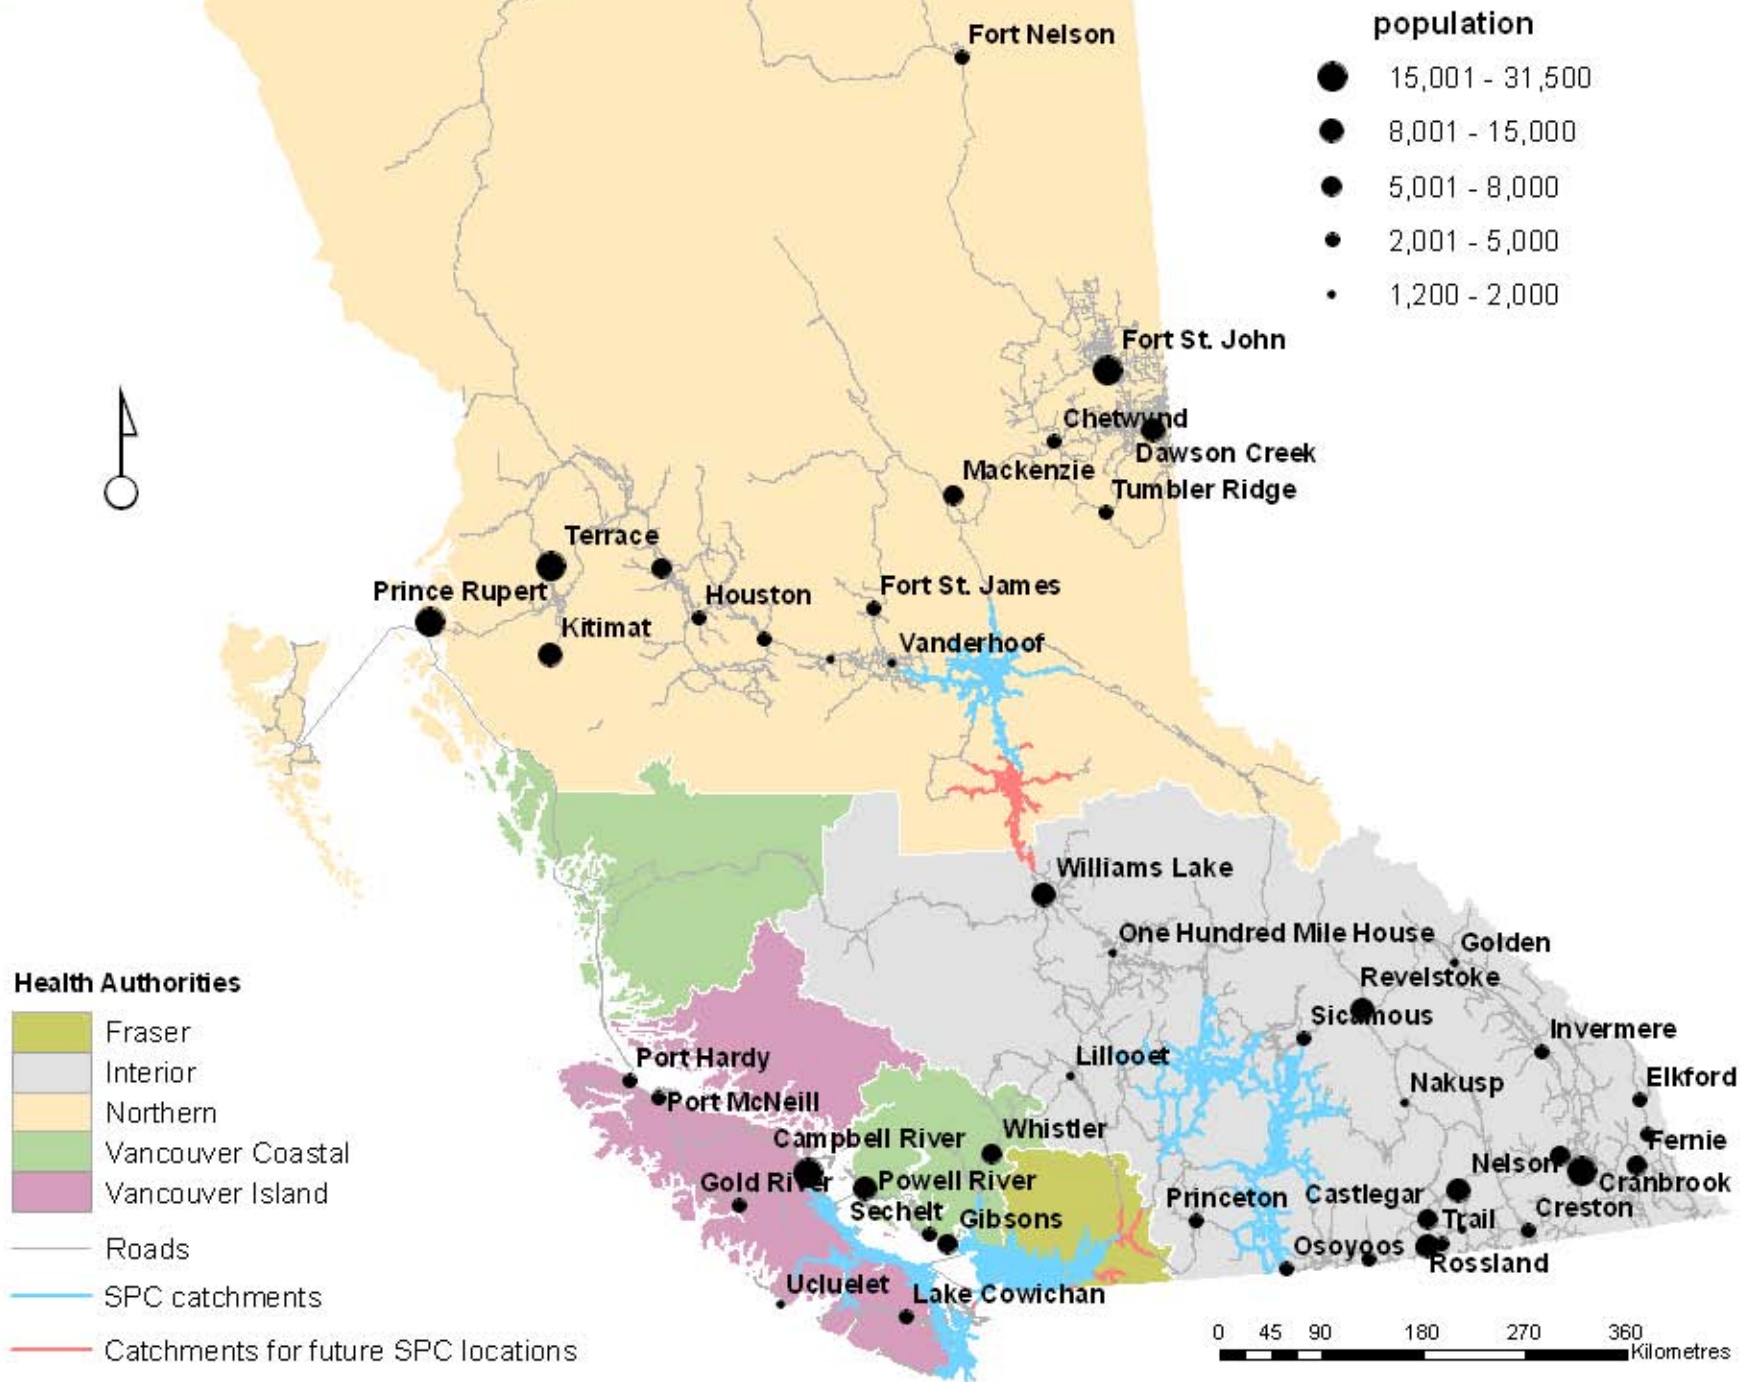

Supplement: MOESM3 [file 9535364]
